# Supplementary material
Source: ML conference proceedings conference paper supplement (https://openaccess.thecvf.com/content/ICCV2025/html/Abdullah_Punching_Bag_vs._ICCV_2025_paper.html)
Supplement: Supplementary file 1 [file Abdullah_Punching_Bag_vs._ICCV_2025_supplemental.pdf]

# Punching Bag vs. Punching Person: Motion Transferability in Videos

## Supplementary Material

The supplementary material provides additional information to complement the main paper.

- Sec. A includes a comprehensive description of the unimodal and multimodal models used in our experiments, along with implementation details.
- Sec. B presents detailed performance tables for models on known and unknown classes, along with more examples, failure cases and analysis figures.
- Sec. C shows the architecture of our proposed approach.
- Sec. D provides the complete lists of coarse and fine classes for the Syn-TA, SSv2-TA, and K400-TA datasets.
- Datasets and relevant code are available at: <https://github.com/raiyaan-abdullah/Motion-Transfer>.

### A. Models

We experimented with several unimodal and multimodal models. This includes traditional convolutional neural networks such as ResNet50 [24], I3D [23] and X3D [17]. We also experimented with SlowFast [18] which utilizes slow and fast pathways. Then we explored models based on the Vision Transformer [13] such as MViTv2 [32] and Rev-MViT [36] which combine multiscale features with the transformer architecture. UniFormerV2 [30] combines pre-trained ViTs with efficient Uniformer [29] designs. AIM [63] utilizes the frozen parameters of pre-trained image models and trains various adapters. Among multimodal models, we experimented with different variations of CLIP [46] designed for activity recognition. ActionCLIP [57] adapts a “pre-train, prompt, and fine-tune” approach. X-CLIP [41] proposes a cross-frame module and a video specific prompting scheme to adapt pre-trained language image models. ViFi-CLIP [47] shows that simple fine-tuning can achieve similar results to using specific temporal components. EZ-CLIP [1] uses temporal visual prompting and spatial adapters to efficiently prepare CLIP for downstream tasks while keeping original model weights frozen. FROSTER [25] utilizes the frozen CLIP model as a teacher for adapting to activity recognition using residual feature distillation. We also experimented with domain generalization methods such as VideoDG [64], STDN [34], and CIR [44] on coarse classes.

**Implementation details:** For training ResNet50, I3D, X3D, MViTv2, Rev-MViT, and SlowFast we utilized the [PySlowFast repository](#) [15] from Meta Research. For other models and domain generalization methods, we used the code from their respective GitHub repositories. We particularly used the model versions: I3D R50, X3D-M, SlowFast R50, MViTv2-S, Rev-MViT-B-16, AIM ViT-B/16,

UniFormerV2-B/16, ActionCLIP ViT-B/16, X-CLIP-B/16, EZ-CLIP ViT-B/16, and FROSTER-B/16. The model hyperparameters for training were kept similar to their configuration for Something-something-v2 and Kinetics400. For Syn-TA, we followed the respective hyperparameters of Kinetics400 for each model. The learning rate was slightly tuned in some cases. We also modified the configurations dependent on the compute machine like batch size, number of GPUs, number of workers, etc to adjust to our resources. The number of epochs was varied by model and dataset depending on how fast the model converges. The models were trained on 1-4 NVIDIA GPUs. The memory of GPUs varied from 11 GB to 80 GB. The configuration files for training the models are available in our [GitHub](#).

### B. Benchmark results

Along with  $D_{abs}$  and HM, we show an additional metric:

**Relative Drop:** The percentage decrease in performance when shifting to an unknown context:

$$D_{rel} = \left| \frac{Known - Unknown}{Known} \right| \times 100$$

**Performance on known vs. unknown classes:** The known and unknown accuracies for both Set 1 and Set 2, covering coarse and fine classes, along with other metrics, are detailed in Tab. 6, Tab. 7 (Syn-TA); Tab. 8, Tab. 9 (K400-TA), and Tab. 10, Tab. 11 (SSv2-TA). For metrics such as known accuracy, unknown accuracy, and harmonic mean (HM), higher values indicate better performance, whereas lower values are desirable for  $D_{abs}$  and  $D_{rel}$ . As discussed in the main paper, there is a noticeable drop in performance for both coarse and fine motions across all models, illustrated more clearly in Fig. 11.

**Performance on coarse vs fine classes:** Fig. 11 also shows that fine classes are generally more challenging than coarse classes. However, notable exceptions include the performance of EZ-CLIP and FROSTER in K400-TA unknown classes.

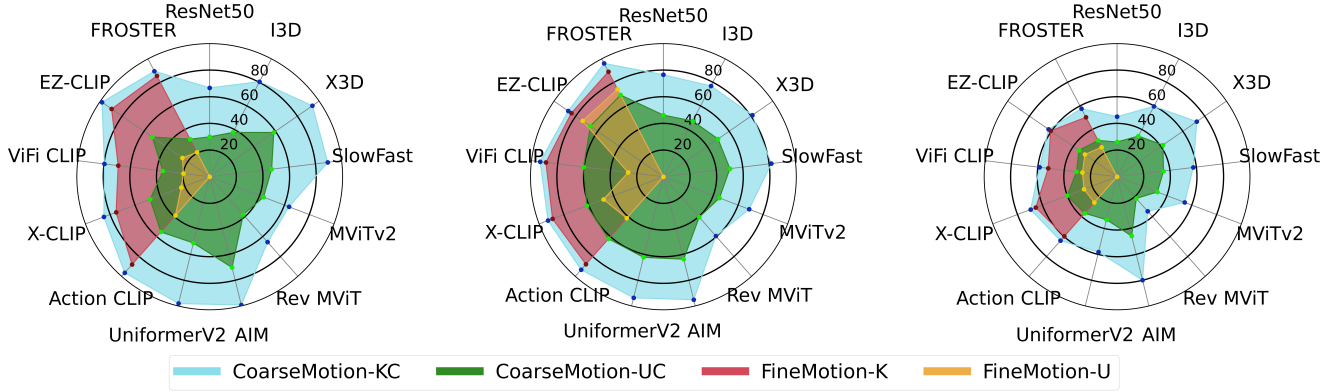

Figure 11. Left: Syn-TA, middle: K400-TA, and right: SSv2-TA. Average detection scores of both sets are given for the three datasets. Performance drop is observed for both coarse (blue to green for all models) and fine motions (red to yellow for multimodal models).

| Model                                | Set 1           |                   |                    |                    |              | Set 2           |                   |                    |                    |              |
|--------------------------------------|-----------------|-------------------|--------------------|--------------------|--------------|-----------------|-------------------|--------------------|--------------------|--------------|
|                                      | Known (Set 1) ↑ | Unknown (Set 2) ↑ | D <sub>abs</sub> ↓ | D <sub>rel</sub> ↓ | HM ↑         | Known (Set 2) ↑ | Unknown (Set 1) ↑ | D <sub>abs</sub> ↓ | D <sub>rel</sub> ↓ | HM ↑         |
| <b>Unimodal models</b>               |                 |                   |                    |                    |              |                 |                   |                    |                    |              |
| ResNet50 [24]                        | 67.59           | 29.26             | 38.33              | 56.70              | 40.84        | 65.74           | 30.61             | 35.13              | 53.43              | 41.77        |
| I3D [23]                             | 83.40           | 37.77             | 45.63              | 54.71              | 51.99        | 77.61           | 37.26             | 40.35              | 51.99              | 50.34        |
| X3D [17]                             | 94.76           | 52.71             | 42.05              | 44.37              | 67.74        | 92.66           | 64.20             | 28.46              | 30.71              | 75.84        |
| SlowFast [18]                        | 90.94           | 46.70             | 44.24              | 48.64              | 61.71        | 87.61           | 47.03             | 40.58              | 46.31              | 61.20        |
| MViTv2 [32]                          | 57.50           | 38.72             | <b>18.78</b>       | 32.66              | 46.27        | 69.89           | 47.74             | <b>22.15</b>       | 31.69              | 56.73        |
| Rev-MViT [36]                        | 62.45           | 40.48             | 21.97              | 35.18              | 49.12        | 68.62           | 35.57             | 33.05              | 48.16              | 46.85        |
| AIM [63]                             | <b>99.81</b>    | <b>70.85</b>      | 28.96              | <b>29.01</b>       | <b>82.87</b> | 98.46           | <b>69.48</b>      | 28.98              | <b>29.43</b>       | <b>81.47</b> |
| UniformerV2 [30]                     | 96.93           | 50.32             | 46.61              | 48.08              | 66.24        | <b>98.99</b>    | 52.08             | 46.91              | 47.38              | 68.25        |
| <b>Multimodal models</b>             |                 |                   |                    |                    |              |                 |                   |                    |                    |              |
| ActionCLIP [57]                      | 97.74           | 55.43             | 42.31              | 43.28              | 70.74        | 94.84           | 55.24             | 39.60              | 41.75              | 69.81        |
| X-CLIP [41]                          | 87.54           | 48.03             | 39.51              | 45.13              | 62.02        | 82.55           | 47.64             | 34.91              | 42.28              | 60.41        |
| ViFi-CLIP [47]                       | 81.32           | 39.04             | 42.28              | 51.99              | 52.75        | 78.03           | 31.88             | 46.15              | 59.14              | 45.26        |
| EZ-CLIP [1]                          | 98.38           | 51.92             | 46.46              | 47.22              | 67.96        | 98.23           | 52.94             | 45.29              | 46.10              | 68.80        |
| FROSTER [25]                         | 91.13           | 31.44             | 59.69              | 65.49              | 46.75        | 87.71           | 32.17             | 55.54              | 63.32              | 47.07        |
| <b>Domain Generalization Methods</b> |                 |                   |                    |                    |              |                 |                   |                    |                    |              |
| VideoDG [64]                         | 98.34           | 45.69             | 52.65              | 53.53              | 62.39        | 97.81           | 41.17             | 56.64              | 57.90              | 57.94        |
| STDN [34]                            | 70.80           | 26.48             | 44.32              | 62.59              | 38.54        | 70.53           | 21.46             | 49.07              | 69.57              | 32.90        |
| CIR [44]                             | 62.01           | 7.42              | 54.59              | 88.03              | 13.25        | 58.25           | 11.76             | 46.49              | 79.81              | 19.56        |

Table 6. Known and unknown accuracy of coarse motions on Syn-TA

| Model           | Set 1           |                   |                    |                    |              | Set 2           |                   |                    |                    |              |
|-----------------|-----------------|-------------------|--------------------|--------------------|--------------|-----------------|-------------------|--------------------|--------------------|--------------|
|                 | Known (Set 1) ↑ | Unknown (Set 2) ↑ | D <sub>abs</sub> ↓ | D <sub>rel</sub> ↓ | HM ↑         | Known (Set 2) ↑ | Unknown (Set 1) ↑ | D <sub>abs</sub> ↓ | D <sub>rel</sub> ↓ | HM ↑         |
| ActionCLIP [57] | 89.58           | <b>40.74</b>      | 48.84              | <b>54.52</b>       | <b>56.00</b> | 86.44           | <b>36.89</b>      | <b>49.55</b>       | <b>57.32</b>       | <b>51.71</b> |
| X-CLIP [41]     | 75.99           | 26.43             | 49.56              | 65.21              | 39.21        | 74.41           | 19.38             | 55.03              | 73.95              | 30.75        |
| ViFi-CLIP [47]  | 72.21           | 23.88             | <b>48.33</b>       | 66.92              | 35.89        | 66.33           | 15.94             | 50.39              | 75.96              | 25.70        |
| EZ-CLIP [1]     | <b>91.69</b>    | 30.23             | 61.46              | 67.03              | 45.46        | <b>87.39</b>    | 19.56             | 67.83              | 77.61              | 31.96        |
| FROSTER [25]    | 87.26           | 22.82             | 64.44              | 73.84              | 36.17        | 83.62           | 18.54             | 65.08              | 77.82              | 30.35        |

Table 7. Known and unknown accuracy of fine motions on Syn-TA

| Model                                | Set 1                    |                            |                      |                      |               | Set 2                    |                            |                      |                      |               |
|--------------------------------------|--------------------------|----------------------------|----------------------|----------------------|---------------|--------------------------|----------------------------|----------------------|----------------------|---------------|
|                                      | Known (Set 1) $\uparrow$ | Unknown (Set 2) $\uparrow$ | $D_{abs} \downarrow$ | $D_{rel} \downarrow$ | HM $\uparrow$ | Known (Set 2) $\uparrow$ | Unknown (Set 1) $\uparrow$ | $D_{abs} \downarrow$ | $D_{rel} \downarrow$ | HM $\uparrow$ |
| <b>Unimodal models</b>               |                          |                            |                      |                      |               |                          |                            |                      |                      |               |
| ResNet50 [24]                        | 79.27                    | 49.74                      | 29.53                | 37.25                | 61.12         | 73.71                    | 42.68                      | 31.03                | 42.09                | 54.05         |
| I3D [23]                             | 80.09                    | 51.76                      | 28.33                | 35.37                | 62.88         | 73.69                    | 42.75                      | 30.94                | 41.98                | 54.10         |
| X3D [17]                             | 80.66                    | 51.42                      | 29.24                | 36.25                | 62.80         | 81.80                    | 48.34                      | 33.46                | 40.90                | 60.76         |
| SlowFast [18]                        | 81.61                    | 52.40                      | 29.21                | 35.79                | 63.82         | 81.80                    | 48.27                      | 33.53                | 40.99                | 60.71         |
| MViTv2 [32]                          | 70.46                    | 47.41                      | 23.05                | 32.71                | 56.68         | 67.30                    | 42.72                      | 24.58                | 36.52                | 52.26         |
| Rev-MViT [36]                        | 58.62                    | 41.80                      | 16.82                | 28.69                | 48.80         | 60.18                    | 39.28                      | <b>20.90</b>         | 34.72                | 47.53         |
| AIM [63]                             | <b>95.00</b>             | 64.77                      | 30.23                | 31.82                | 77.02         | 95.09                    | 62.70                      | 32.39                | 34.06                | 75.57         |
| UniformerV2 [30]                     | 92.81                    | 63.81                      | 29.00                | 31.24                | 75.62         | 94.32                    | 60.77                      | 33.55                | 35.57                | 73.91         |
| <b>Multimodal models</b>             |                          |                            |                      |                      |               |                          |                            |                      |                      |               |
| ActionCLIP [57]                      | 92.75                    | 65.20                      | 27.55                | 29.70                | 76.57         | 93.74                    | 59.29                      | 34.45                | 36.75                | 72.63         |
| X-CLIP [41]                          | 92.54                    | 63.36                      | 29.18                | 31.53                | 75.21         | 92.85                    | 59.59                      | 33.26                | 35.82                | 72.59         |
| ViFi-CLIP [47]                       | 92.66                    | 62.30                      | 30.36                | 32.76                | 74.50         | 93.83                    | 58.58                      | 35.25                | 37.56                | 72.12         |
| EZ-CLIP [1]                          | 85.70                    | 68.39                      | <b>17.31</b>         | <b>20.19</b>         | 76.07         | 88.07                    | 65.01                      | 23.06                | <b>26.18</b>         | 74.80         |
| FROSTER [25]                         | 92.68                    | <b>69.38</b>               | 23.30                | 25.14                | <b>79.35</b>  | <b>99.31</b>             | <b>69.09</b>               | 30.22                | 30.43                | <b>81.48</b>  |
| <b>Domain Generalization Methods</b> |                          |                            |                      |                      |               |                          |                            |                      |                      |               |
| VideoDG [64]                         | 84.94                    | 56.63                      | 28.31                | 33.32                | 67.95         | 87.28                    | 51.28                      | 36.00                | 41.24                | 64.60         |
| STDN [34]                            | 65.17                    | 47.96                      | 17.21                | 26.40                | 55.25         | 71.05                    | 44.24                      | 26.81                | 37.73                | 54.52         |
| CIR [44]                             | 68.53                    | 13.82                      | 54.71                | 79.83                | 23.00         | 47.22                    | 11.50                      | 57.03                | 83.21                | 19.69         |

Table 8. Known and unknown accuracy of coarse motions on K400-TA

| Model           | Set 1                    |                            |                      |                      |               | Set 2                    |                            |                      |                      |               |
|-----------------|--------------------------|----------------------------|----------------------|----------------------|---------------|--------------------------|----------------------------|----------------------|----------------------|---------------|
|                 | Known (Set 1) $\uparrow$ | Unknown (Set 2) $\uparrow$ | $D_{abs} \downarrow$ | $D_{rel} \downarrow$ | HM $\uparrow$ | Known (Set 2) $\uparrow$ | Unknown (Set 1) $\uparrow$ | $D_{abs} \downarrow$ | $D_{rel} \downarrow$ | HM $\uparrow$ |
| ActionCLIP [57] | 86.84                    | 45.86                      | 40.98                | 47.19                | 60.02         | 88.66                    | 37.18                      | 51.48                | 58.06                | 52.39         |
| X-CLIP [41]     | <b>88.98</b>             | 51.95                      | 37.03                | 41.61                | 65.60         | 89.14                    | 44.27                      | 44.87                | 50.33                | 59.15         |
| ViFi-CLIP [47]  | 88.44                    | 29.63                      | 58.81                | 66.49                | 44.38         | 89.38                    | 23.77                      | 65.61                | 73.40                | 37.55         |
| EZ-CLIP [1]     | 82.24                    | <b>77.20</b>               | <b>5.04</b>          | <b>6.12</b>          | 79.64         | 85.29                    | 70.70                      | <b>14.59</b>         | <b>17.10</b>         | 77.31         |
| FROSTER [25]    | 88.35                    | 76.97                      | 11.38                | 12.88                | <b>82.26</b>  | <b>89.52</b>             | <b>71.26</b>               | 18.26                | 20.39                | <b>79.35</b>  |

Table 9. Known and unknown accuracy of fine motions on K400-TA

| Model                                | Set 1                    |                            |                      |                      |               | Set 2                    |                            |                      |                      |               |
|--------------------------------------|--------------------------|----------------------------|----------------------|----------------------|---------------|--------------------------|----------------------------|----------------------|----------------------|---------------|
|                                      | Known (Set 1) $\uparrow$ | Unknown (Set 2) $\uparrow$ | $D_{abs} \downarrow$ | $D_{rel} \downarrow$ | HM $\uparrow$ | Known (Set 2) $\uparrow$ | Unknown (Set 1) $\uparrow$ | $D_{abs} \downarrow$ | $D_{rel} \downarrow$ | HM $\uparrow$ |
| <b>Unimodal models</b>               |                          |                            |                      |                      |               |                          |                            |                      |                      |               |
| ResNet50 [24]                        | 47.02                    | 25.67                      | 21.35                | 45.40                | 33.21         | 43.13                    | 26.50                      | 16.63                | 38.55                | 32.82         |
| I3D [23]                             | 63.19                    | 33.20                      | 29.99                | 47.46                | 43.53         | 56.02                    | 35.61                      | 20.41                | 36.43                | 43.54         |
| X3D [17]                             | 74.43                    | 40.11                      | 34.32                | 46.11                | 52.12         | 71.04                    | 43.52                      | 27.52                | 38.73                | 53.97         |
| SlowFast [18]                        | 61.47                    | 34.48                      | 26.99                | 43.90                | 44.17         | 53.87                    | 35.83                      | 18.04                | 33.48                | 43.03         |
| MViTv2 [32]                          | 59.46                    | 32.71                      | 26.75                | 44.98                | 42.20         | 49.16                    | 32.04                      | 17.12                | 34.82                | 38.79         |
| Rev-MViT [36]                        | 38.32                    | 22.71                      | <b>15.61</b>         | <b>40.73</b>         | 28.51         | 30.97                    | 20.74                      | <b>10.23</b>         | <b>33.03</b>         | 24.84         |
| AIM [63]                             | <b>81.62</b>             | <b>43.52</b>               | 38.10                | 46.67                | <b>56.77</b>  | <b>78.27</b>             | <b>48.13</b>               | 30.14                | 38.50                | <b>59.60</b>  |
| UniformerV2 [30]                     | 59.06                    | 32.47                      | 26.59                | 45.02                | 41.90         | 57.26                    | 33.93                      | 23.33                | 40.74                | 42.61         |
| <b>Multimodal models</b>             |                          |                            |                      |                      |               |                          |                            |                      |                      |               |
| ActionCLIP [57]                      | 66.44                    | 34.67                      | 31.77                | 47.81                | 45.56         | 61.77                    | 38.66                      | 23.11                | 37.41                | 47.55         |
| X-CLIP [41]                          | 72.50                    | 37.80                      | 34.70                | 47.86                | 49.69         | 66.49                    | 42.41                      | 24.08                | 36.21                | 51.78         |
| ViFi-CLIP [47]                       | 60.17                    | 28.49                      | 31.68                | 52.65                | 38.67         | 57.21                    | 32.90                      | 24.31                | 42.49                | 41.77         |
| EZ-CLIP [1]                          | 64.86                    | 34.26                      | 30.60                | 47.17                | 44.83         | 60.24                    | 35.43                      | 24.81                | 41.18                | 44.61         |
| FROSTER [25]                         | 59.01                    | 28.68                      | 30.33                | 51.39                | 38.60         | 56.30                    | 32.69                      | 23.61                | 41.93                | 41.36         |
| <b>Domain Generalization Methods</b> |                          |                            |                      |                      |               |                          |                            |                      |                      |               |
| VideoDG [64]                         | 59.21                    | 30.69                      | 28.52                | 48.16                | 40.42         | 55.30                    | 32.39                      | 22.91                | 41.42                | 40.85         |
| STDN [34]                            | 37.44                    | 22.33                      | 15.11                | 40.35                | 27.97         | 34.43                    | 22.29                      | 12.14                | 35.25                | 27.06         |
| CIR [44]                             | 48.80                    | 31.84                      | 16.96                | 34.75                | 38.53         | 47.22                    | 32.10                      | 15.12                | 32.02                | 38.21         |

Table 10. Known and unknown accuracy of coarse motions on SSv2-TA

| Model           | Set 1                    |                            |                      |                      |               | Set 2                    |                            |                      |                      |               |
|-----------------|--------------------------|----------------------------|----------------------|----------------------|---------------|--------------------------|----------------------------|----------------------|----------------------|---------------|
|                 | Known (Set 1) $\uparrow$ | Unknown (Set 2) $\uparrow$ | $D_{abs} \downarrow$ | $D_{rel} \downarrow$ | HM $\uparrow$ | Known (Set 2) $\uparrow$ | Unknown (Set 1) $\uparrow$ | $D_{abs} \downarrow$ | $D_{rel} \downarrow$ | HM $\uparrow$ |
| ActionCLIP [57] | 60.12                    | 24.10                      | 36.02                | 59.91                | 34.40         | 59.33                    | 27.58                      | 31.75                | 53.51                | 37.65         |
| X-CLIP [41]     | <b>66.01</b>             | 24.92                      | 41.09                | 62.24                | 36.18         | <b>64.61</b>             | <b>28.14</b>               | 36.47                | 56.44                | <b>39.20</b>  |
| ViFi-CLIP [47]  | 54.02                    | 26.59                      | <b>27.43</b>         | 50.77                | 35.63         | 50.24                    | 25.97                      | 24.27                | 48.30                | 34.24         |
| EZ-CLIP [1]     | 61.08                    | <b>31.83</b>               | 29.25                | <b>47.88</b>         | <b>41.85</b>  | 58.58                    | 27.64                      | 30.94                | 52.81                | 37.55         |
| FROSTER [25]    | 51.90                    | 23.58                      | 28.32                | 54.56                | 32.42         | 48.79                    | 26.40                      | <b>22.39</b>         | <b>45.89</b>         | 34.26         |

Table 11. Known and unknown accuracy of fine motions on SSv2-TA

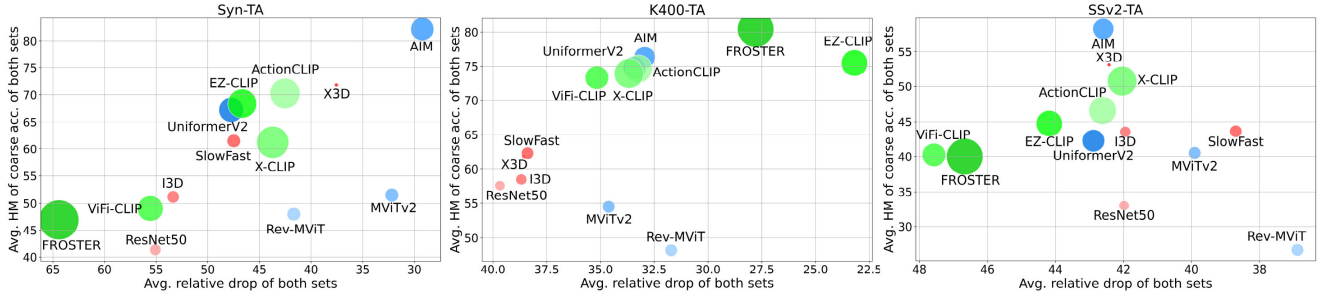

Figure 12. **Effect of model size for each dataset:** Average harmonic mean of coarse accuracy vs. relative drop  $D_{rel}$ . Bubble sizes correspond to the total number of model parameters, with colors indicating architecture types (red: CNN, blue: transformer - unimodal, green: transformer - multimodal). Models with larger parameter counts perform better on K400-TA, where videos contain rich spatial cues. This effect is less pronounced in Syn-TA, which requires some temporal understanding. In SSv2-TA, which is heavily reliant on temporal information, model size does not show a clear correlation with performance.

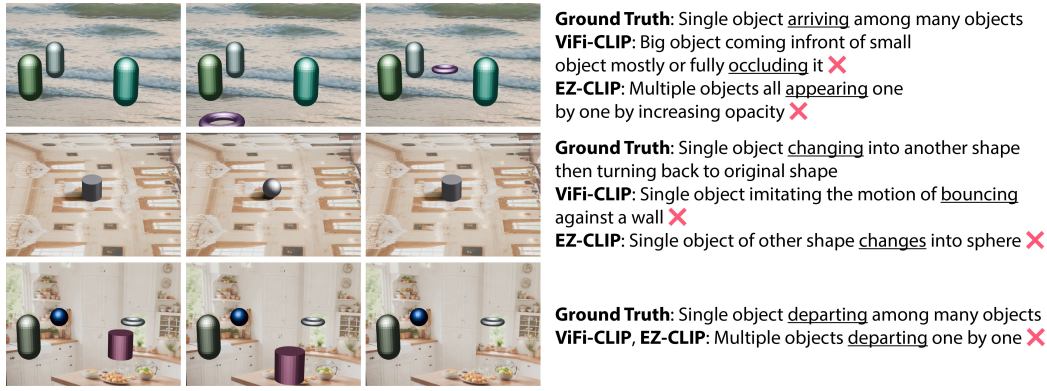

Figure 13. **Example of failure cases for FineMotion-U in Syn-TA with ViFi-CLIP, EZ-CLIP:** (Top) For the arrival of single objects among many objects, ViFi-CLIP is confusing the motion with occlusion as the arriving pink torus temporarily occludes the objects before completing its path. EZ-CLIP hallucinates the multiple objects are appearing in the scene. (Middle) The object in the scene changes its shape to a sphere and turns back. EZ-CLIP thinks the object did not transform back. (Bottom) Both models are mispredicting that the other objects are departing as well after the first object.

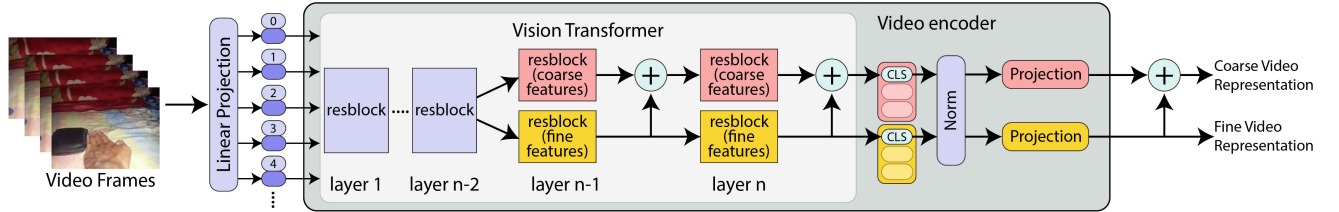

Figure 14. **Disentanglement of coarse and fine video features:** In the final two layers of the vision transformer, two branches extract coarse and fine motions simultaneously. The fine embeddings are added to the high-level embedding at each step via residual connections, combining detailed context with the broader motion features. The fine projection layer is trainable. Overall, this enables each branch to focus on disentangling the features most relevant to its specific role.

| Set            | Model       | Syn-TA        |       | K400-TA       |       | SSv2-TA       |       |
|----------------|-------------|---------------|-------|---------------|-------|---------------|-------|
|                |             | Known/Unknown | HM    | Known/Unknown | HM    | Known/Unknown | HM    |
| Coarse motions |             |               |       |               |       |               |       |
| Set 1          | Base-Coarse | 98.38/51.92   | 67.96 | 85.70/68.39   | 76.07 | 64.86/34.26   | 44.83 |
|                | Ours        | 99.76/54.75   | 70.69 | 84.15/69.39   | 76.06 | 69.17/35.47   | 46.89 |
| Set 2          | Base-Coarse | 98.23/52.94   | 68.80 | 88.07/65.01   | 74.80 | 60.24/35.43   | 44.61 |
|                | Ours        | 99.62/56.41   | 72.03 | 88.53/65.36   | 75.20 | 65.01/37.82   | 47.82 |

Table 12. **Performance comparison for disentanglement approach:** Comparison of baseline vs. our proposed method for coarse motions.

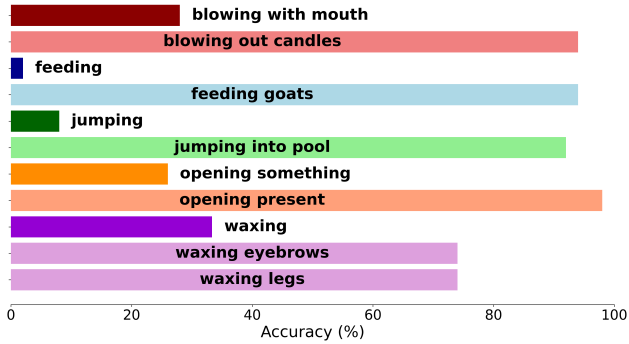

Figure 15. *Example cases of K400-TA where unknown fine performance is higher*: The bars with a darker color denote coarse classes while their corresponding fine class is shown in a lighter color. The accuracy of coarse classes is noticeably lower than fine counterparts. Results are shown for EZ-CLIP model.

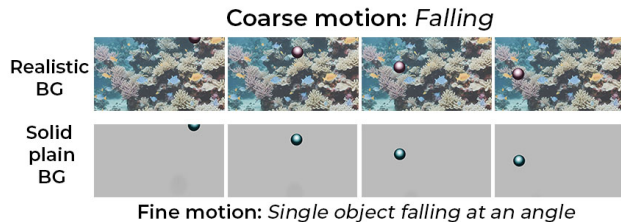

Figure 16. *Preview of Syn-TA realistic vs. solid plain background*: The absence of complex textures in the background enhances the model’s ability to comprehend object motion. This suggests that even for relatively simple motions, models are often challenged by textured backgrounds.

### C. Disentanglement architecture

We tested our approach on EZ-CLIP [1], chosen for its efficiency due to fewer learnable parameters, achieving competitive results with reduced time and computation. We modified EZ-CLIP’s video encoder by adding two branches in the final layers, duplicating the transformer blocks in the last two layers to separate feature learning. The earlier layers capture low and mid-level features, while one branch of the final layers specializes in high-level (coarse) concepts (e.g., “Pushing”) and the other focuses on fine-grained context (e.g., “Pushing something from left to right”). As shown in Fig. 14, the fine feature is combined with the coarse feature at every step. The class token (CLS) from each branch flows through a shared normalization layer and distinct projection layers (fine one is trainable), generating two embeddings. We also disabled passing EZ-CLIP’s temporal prompt in the final two layers. This setup allows the coarse branch to focus on high-level features while the fine branch selectively contributes necessary detail, improving overall coarse accuracy and maintaining focused feature disentanglement in each branch. As shown in Tab. 12, our approach improves coarse motion accuracy on temporal

datasets such as Syn-TA and SSv2-TA.

## D. Detailed list of classes

The full list of coarse classes and fine classes for each dataset is provided in this section. The split files for each of the dataset is also provided in our [GitHub](#).

### D.1. Syn-TA

In our newly proposed dataset ‘Syn-TA’, we generated videos of plain 3D objects, such as cubes, spheres, cylinders, etc, performing various motions using the 3D modeling software Blender [10]. Each video features a realistic background depicting either outdoor scenes (e.g., desert, forest, sunset) or indoor settings (e.g., coffee shop, kitchen, library), where 3D objects perform various motions. The videos are rendered at 24 frames per second (FPS) with a resolution of 1920x1080 pixels. The camera view is either from the front or the top.

The dataset includes 20 coarse motions, which are further subdivided into 100 fine motions. Each video contains, on average, 105 frames with a standard deviation of approximately 46. The fine motions are split into two subsets:  $S1$  (53 classes) and  $S2$  (47 classes). Each set has its own collection of object shapes and backgrounds, creating a more challenging setting for evaluating model performance on novel scenarios. Each fine motion is labeled with its corresponding coarse class and additional contextual details. Both subsets include at least two fine classes under each coarse motion. If a coarse class contains an even number of fine classes, they are evenly distributed between  $S1$  and  $S2$ . For coarse classes with an odd number of fine motions,  $S1$  is assigned one extra class. For example, for the coarse class “*departing*”, the fine class “*multiple objects departing simultaneously*” is in  $S1$  while “*multiple objects departing one by one*” is in  $S2$ .

This carefully constructed dataset is intended to serve as a diagnostic benchmark for evaluating how models adapt to detecting high-level actions under varying contexts. The Blender Python API code used to generate the videos is available in our [GitHub](#), and samples of each class are provided. The videos are stored in standard .mp4 format and follow the structure of Kinetics400 [26], ensuring compatibility with existing dataloader implementations.

Table 13. List of coarse classes for Syn-TA

| Coarse ID | Coarse motion       |
|-----------|---------------------|
| 0         | appearing           |
| 1         | arriving            |
| 2         | bouncing            |
| 3         | changing color      |
| 4         | changing shape      |
| 5         | cloning             |
| 6         | departing           |
| 7         | disappearing        |
| 8         | expanding           |
| 9         | falling             |
| 10        | following           |
| 11        | merging             |
| 12        | moving in a path    |
| 13        | not colliding       |
| 14        | occlusion           |
| 15        | orbiting            |
| 16        | rising              |
| 17        | shooting projectile |
| 18        | shrinking           |
| 19        | teleporting         |



Table 14. List of the fine classes in Syn-TA - Set 1

| Coarse ID | Coarse motion  | Fine ID | Coarse motion + fine motion                                                                                  |
|-----------|----------------|---------|--------------------------------------------------------------------------------------------------------------|
| 0         | appearing      | 0       | Single object appearing by increasing opacity                                                                |
|           |                | 1       | Multiple objects all appearing simultaneously by increasing opacity                                          |
| 1         | arriving       | 2       | Single object arriving                                                                                       |
|           |                | 3       | Multiple objects arriving simultaneously                                                                     |
|           |                | 4       | Single object arriving beside another single object                                                          |
| 2         | bouncing       | 5       | Single ball bouncing on a plain surface eventually stops                                                     |
|           |                | 6       | Multiple balls bouncing on plain surface at very different heights eventually stop                           |
|           |                | 7       | Single object bouncing and going forward                                                                     |
|           |                | 8       | Single object imitating the motion of bouncing and going down stairs                                         |
| 3         | changing color | 9       | Single object keeps changing colors                                                                          |
|           |                | 10      | Two objects changing colors by switching with each other                                                     |
|           |                | 11      | Single object changing from bright to dark color                                                             |
| 4         | changing shape | 12      | Single object of other shape changes into pyramid                                                            |
|           |                | 13      | Single object of other shape changes into cube                                                               |
|           |                | 14      | Two objects changing shapes by switching with each other                                                     |
| 5         | cloning        | 15      | Single object cloning into two identical objects both going in same direction                                |
|           |                | 16      | Single object cloning into multiple identical objects one by one                                             |
|           |                | 17      | Single object cloning into one identical object and another object with different colour                     |
| 6         | departing      | 18      | Single object departing                                                                                      |
|           |                | 19      | Multiple objects departing simultaneously                                                                    |
|           |                | 20      | Single object departing beside another single object                                                         |
| 7         | disappearing   | 21      | Single object disappearing by decreasing opacity                                                             |
|           |                | 22      | Multiple objects all disappearing simultaneously by decreasing opacity                                       |
| 8         | expanding      | 23      | Small single object expanding into medium object                                                             |
|           |                | 24      | Two different small objects expanding into similar larger size                                               |
| 9         | falling        | 25      | Single object falling straight down without changing direction                                               |
|           |                | 26      | Single object falling down in a zigzag pattern                                                               |
| 10        | following      | 27      | Single object following another object all the time while moving in a straight line                          |
|           |                | 28      | Single object following another object for some time while moving in straight line then follows another path |
|           |                | 29      | Multiple objects following one object all the time in a straight line                                        |
| 11        | merging        | 30      | Two objects merging into one similar sized object while moving towards each other                            |

Continued on next page

| Coarse ID | Coarse motion       | Fine ID | Coarse motion + fine motion                                                                                                               |
|-----------|---------------------|---------|-------------------------------------------------------------------------------------------------------------------------------------------|
| 12        | moving in a path    | 31      | Multiple objects merging into one big object                                                                                              |
|           |                     | 32      | Single object moving slowly from one position to another and stopping                                                                     |
|           |                     | 33      | Single object moving slowly from one position to another and coming back to original position                                             |
|           |                     | 34      | Single object moving from left to right                                                                                                   |
| 13        | not colliding       | 35      | Two objects moving towards each other but not colliding                                                                                   |
|           |                     | 36      | Single object moving towards single stationary object but not colliding with it                                                           |
|           |                     | 37      | Multiple objects moving towards each other but not colliding among themselves                                                             |
| 14        | occlusion           | 38      | Small object coming in front of big object barely occluding it                                                                            |
|           |                     | 39      | Object which is occluding another object switches places and goes behind it                                                               |
| 15        | orbiting            | 40      | Single object orbiting another object in the center in clockwise direction on horizontal plane                                            |
|           |                     | 41      | Single object orbiting another object in the center in clockwise direction first and then counter clockwise direction on horizontal plane |
|           |                     | 42      | Single object orbiting another object in the center in clockwise direction on vertical plane                                              |
| 16        | rising              | 43      | Single object rising straight up without changing direction                                                                               |
|           |                     | 44      | Single object rising in a zigzag pattern                                                                                                  |
| 17        | shooting projectile | 45      | Shooting projectile from one corner to opposite corner                                                                                    |
|           |                     | 46      | Shooting projectile from right corner to left corner                                                                                      |
|           |                     | 47      | Shooting two projectiles from same position to opposite corner                                                                            |
| 18        | shrinking           | 48      | Large single object shrinking into medium sized object                                                                                    |
|           |                     | 49      | Two different large objects shrinking into same smaller size                                                                              |
| 19        | teleporting         | 50      | Single object teleporting from one corner to another                                                                                      |
|           |                     | 51      | Single object teleporting from one corner to another while another object is in the center                                                |
|           |                     | 52      | Two objects in opposite corners switch places by teleporting                                                                              |

Table 15. List of the classes in Syn-TA - Set 2

| Coarse ID | Coarse motion | Fine ID | Coarse motion + fine motion                                     |
|-----------|---------------|---------|-----------------------------------------------------------------|
| 0         | appearing     | 0       | Multiple objects all appearing one by one by increasing opacity |
|           |               | 1       | Two objects appearing among two other objects                   |
| 1         | arriving      | 2       | Multiple objects arriving one by one                            |
|           |               | 3       | Single object arriving among many objects                       |

Continued on next page



| Coarse ID              | Coarse motion    | Fine ID | Coarse motion + fine motion                                                                           |
|------------------------|------------------|---------|-------------------------------------------------------------------------------------------------------|
| 2                      | bouncing         | 4       | Single object arriving beside another single object, pausing then going away                          |
|                        |                  | 5       | Multiple objects bouncing on plain surface at almost similar heights eventually stop                  |
|                        |                  | 6       | Single object imitating the motion of bouncing against a wall                                         |
|                        |                  | 7       | Single object bouncing on a plain surface perpetually                                                 |
|                        |                  | 8       | Single object imitating the motion of bouncing and going up stairs                                    |
| 3                      | changing color   | 9       | Single object changing from dark to bright color                                                      |
|                        |                  | 10      | Single object changing color then returning to previous one                                           |
| 4                      | changing shape   | 11      | Single object of other shape changes into sphere                                                      |
|                        |                  | 12      | Single object of other shape changes into cylinder                                                    |
|                        |                  | 13      | Single object changing into another shape then turning back to original shape                         |
| 5                      | cloning          | 14      | Single object cloning into two identical objects both going in different directions                   |
|                        |                  | 15      | Single object cloning into multiple identical objects at once                                         |
| 6                      | departing        | 16      | Multiple objects departing one by one                                                                 |
|                        |                  | 17      | Single object departing among many objects                                                            |
|                        |                  | 18      | Single object departing beside another single object, then coming back shortly                        |
| 7                      | disappearing     | 19      | Multiple objects all disappearing one by one by decreasing opacity                                    |
|                        |                  | 20      | Multiple objects some disappearing and some remaining                                                 |
| 8                      | expanding        | 21      | Small single object expanding into large object                                                       |
|                        |                  | 22      | Two same small objects expanding into different bigger sizes                                          |
| 9                      | falling          | 23      | Single object falling at an angle                                                                     |
|                        |                  | 24      | Single object falling at a curved path                                                                |
| 10                     | following        | 25      | Single object following another object all the time in a complex path                                 |
|                        |                  | 26      | Single object not following another object at first but later starts following                        |
| 11                     | merging          | 27      | Faster object merging with slower object into one similar sized object while moving in same direction |
|                        |                  | 28      | Multiple objects merging into multiple big objects                                                    |
| 12                     | moving in a path | 29      | Single object moving quickly from one position to another and stopping                                |
|                        |                  | 30      | Two objects moving and switching their positions                                                      |
|                        |                  | 31      | Single object moving from right to left                                                               |
| 13                     | not colliding    | 32      | Two objects moving in opposite directions in circular path but not colliding later                    |
|                        |                  | 33      | One object moving towards multiple stationary objects but not colliding                               |
| Continued on next page |                  |         |                                                                                                       |

| Coarse ID | Coarse motion       | Fine ID | Coarse motion + fine motion                                                                                                                      |
|-----------|---------------------|---------|--------------------------------------------------------------------------------------------------------------------------------------------------|
| 14        | occlusion           | 34      | Big object coming in front of small object mostly or fully occluding it                                                                          |
|           |                     | 35      | Two objects partially occluding two other objects switch positions with the latter two and go behind them                                        |
| 15        | orbiting            | 36      | Single object orbiting another object in the center in counter clockwise direction on horizontal plane                                           |
|           |                     | 37      | Single object orbiting another object in clockwise direction then second object orbiting first object in clockwise direction on horizontal plane |
|           |                     | 38      | Single object orbiting another object in the center in counter clockwise direction on vertical plane                                             |
| 16        | rising              | 39      | Single object rising at an angle                                                                                                                 |
|           |                     | 40      | Single object rising at a curved path                                                                                                            |
| 17        | shooting projectile | 41      | Shooting projectile from left corner to right corner                                                                                             |
|           |                     | 42      | Shooting two projectiles from opposite corners switching their positions                                                                         |
| 18        | shrinking           | 43      | Large single object shrinking into very small object                                                                                             |
|           |                     | 44      | Two different large objects shrinking into different smaller sizes                                                                               |
| 19        | teleporting         | 45      | Four objects in four corners switch places by teleporting                                                                                        |
|           |                     | 46      | Two objects together in one corner then one teleports to other corner                                                                            |

## D.2. Kinetics400 - Transferable Activity

Table 16. List of coarse classes for K400-TA

| Coarse ID | Coarse motion                                |
|-----------|----------------------------------------------|
| 0         | blowing with mouth                           |
| 1         | building a structure                         |
| 2         | catching or throwing other objects than ball |
| 3         | cleaning                                     |
| 4         | climbing                                     |
| 5         | cooking                                      |
| 6         | dancing                                      |
| 7         | drinking                                     |
| 8         | eating                                       |
| 9         | feeding                                      |
| 10        | fishing                                      |
| 11        | folding                                      |
| 12        | gardening                                    |
| 13        | grooming animal                              |
| 14        | hair care                                    |
| 15        | juggling                                     |
| 16        | jumping                                      |
| 17        | kicking                                      |
| 18        | maintaining vehicle                          |
| 19        | massaging                                    |

| Coarse ID | Coarse motion                          |
|-----------|----------------------------------------|
| 20        | music without instrument               |
| 21        | opening something                      |
| 22        | petting animal                         |
| 23        | playing by hitting ball with something |
| 24        | playing instrument                     |
| 25        | playing with ball in hand              |
| 26        | preparing fruit or vegetable           |
| 27        | punching                               |
| 28        | pushing                                |
| 29        | reading                                |
| 30        | riding animal                          |
| 31        | riding on something over water         |
| 32        | riding vehicle                         |
| 33        | shaving                                |
| 34        | skiing                                 |
| 35        | smoking                                |
| 36        | swimming                               |
| 37        | toddler interaction                    |
| 38        | tying                                  |
| 39        | washing                                |
| 40        | waxing                                 |

Table 17. List of the fine classes in K400-TA Set 1

| Coarse ID | Coarse motion                                   | Fine ID | Coarse motion + fine motion  |
|-----------|-------------------------------------------------|---------|------------------------------|
| 0         | blowing with mouth                              | 0       | balloon blowing              |
| 1         | building a structure                            | 1       | building cabinet             |
| 2         | catching or throwing<br>other objects than ball | 2       | catching or throwing frisbee |
|           |                                                 | 3       | throwing axe                 |
|           |                                                 | 4       | cleaning floor               |
| 3         | cleaning                                        | 5       | cleaning gutters             |
|           |                                                 | 6       | cleaning pool                |
|           |                                                 | 7       | climbing a rope              |
| 4         | climbing                                        | 8       | climbing ladder              |
|           |                                                 | 9       | baking cookies               |
|           |                                                 | 10      | barbequing                   |
| 5         | cooking                                         | 11      | cooking chicken              |
|           |                                                 | 12      | cooking egg                  |
|           |                                                 | 13      | belly dancing                |
| 6         | dancing                                         | 14      | breakdancing                 |
|           |                                                 | 15      | country line dancing         |
|           |                                                 | 16      | dancing ballet               |
|           |                                                 | 17      | dancing charleston           |
|           |                                                 | 18      | dancing gangnam style        |
|           |                                                 | 19      | dancing macarena             |
|           |                                                 | 20      | jumpstyle dancing            |
|           |                                                 | 21      | drinking beer                |
| 7         | drinking                                        | 22      | drinking shots               |
| 8         | eating                                          | 23      | dining                       |

Continued on next page

| Coarse ID | Coarse motion                          | Fine ID | Coarse motion + fine motion   |
|-----------|----------------------------------------|---------|-------------------------------|
|           |                                        | 24      | eating burger                 |
|           |                                        | 25      | eating cake                   |
|           |                                        | 26      | eating carrots                |
|           |                                        | 27      | eating chips                  |
|           |                                        | 28      | eating doughnuts              |
| 9         | feeding                                | 29      | feeding birds                 |
| 10        | fishing                                | 30      | feeding fish                  |
| 11        | folding                                | 31      | catching fish                 |
|           |                                        | 32      | folding clothes               |
| 12        | gardening                              | 33      | folding napkins               |
|           |                                        | 34      | arranging flowers             |
|           |                                        | 35      | planting trees                |
| 13        | grooming animal                        | 36      | stomping grapes               |
| 14        | hair care                              | 37      | grooming dog                  |
|           |                                        | 38      | braiding hair                 |
|           |                                        | 39      | brushing hair                 |
|           |                                        | 40      | curling hair                  |
|           |                                        | 41      | dying hair                    |
| 15        | juggling                               | 42      | contact juggling              |
| 16        | jumping                                | 43      | juggling balls                |
|           |                                        | 44      | high jump                     |
| 17        | kicking                                | 45      | drop kicking                  |
|           |                                        | 46      | high kick                     |
|           |                                        | 47      | kicking field goal            |
|           |                                        | 48      | kicking soccer ball           |
| 18        | maintaining vehicle                    | 49      | changing oil                  |
|           |                                        | 50      | changing wheel                |
| 19        | massaging                              | 51      | massaging back                |
|           |                                        | 52      | massaging feet                |
| 20        | music without instrument               | 53      | air drumming                  |
|           |                                        | 54      | beatboxing                    |
| 21        | opening something                      | 55      | opening bottle                |
| 22        | petting animal                         | 56      | petting animal (not cat)      |
| 23        | playing by hitting ball with something | 57      | golf chipping                 |
|           |                                        | 58      | golf driving                  |
|           |                                        | 59      | hitting baseball              |
| 24        | playing instrument                     | 60      | busking                       |
|           |                                        | 61      | drumming fingers              |
|           |                                        | 62      | playing accordion             |
|           |                                        | 63      | playing bagpipes              |
|           |                                        | 64      | playing bass guitar           |
|           |                                        | 65      | playing cello                 |
|           |                                        | 66      | playing clarinet              |
|           |                                        | 67      | playing cymbals               |
|           |                                        | 68      | playing didgeridoo            |
|           |                                        | 69      | playing drums                 |
|           |                                        | 70      | playing flute                 |
|           |                                        | 71      | playing guitar                |
|           |                                        | 72      | playing harmonica             |
| 25        | playing with ball in hand              | 73      | catching or throwing baseball |
|           |                                        | 74      | dodgeball                     |

Continued on next page

| Coarse ID | Coarse motion                  | Fine ID | Coarse motion + fine motion         |
|-----------|--------------------------------|---------|-------------------------------------|
|           |                                | 75      | dribbling basketball                |
|           |                                | 76      | dunking basketball                  |
|           |                                | 77      | passing American football (in game) |
|           |                                | 78      | throwing ball                       |
| 26        | preparing fruit or vegetable   | 79      | cutting pineapple                   |
|           |                                | 80      | peeling apples                      |
| 27        | punching                       | 81      | punching bag                        |
|           |                                | 82      | pushing car                         |
| 28        | pushing                        | 83      | pushing cart                        |
| 29        | reading                        | 84      | reading book                        |
|           |                                | 85      | riding camel                        |
| 30        | riding animal                  | 86      | riding elephant                     |
|           |                                | 87      | crossing river                      |
| 31        | riding on something over water | 88      | sailing                             |
|           |                                | 89      | surfing water                       |
|           |                                | 90      | biking through snow                 |
|           |                                | 91      | driving car                         |
| 32        | riding vehicle                 | 92      | motorcycling                        |
|           |                                | 93      | riding scooter                      |
|           |                                | 94      | snowmobiling                        |
| 33        | shaving                        | 95      | shaving head                        |
|           |                                | 96      | ski jumping                         |
| 34        | skiing                         | 97      | skiing (not slalom or crosscountry) |
|           |                                | 98      | water skiing                        |
| 35        | smoking                        | 99      | smoking cigarette or short object   |
|           |                                | 100     | scuba diving                        |
| 36        | swimming                       | 101     | swimming backstroke                 |
|           |                                | 102     | swimming breast stroke              |
|           |                                | 103     | baby waking up                      |
| 37        | toddler interaction            | 104     | carrying baby                       |
|           |                                | 105     | tying bow tie                       |
| 38        | tying                          | 106     | tying knot (not on a tie)           |
|           |                                | 107     | washing dishes                      |
| 39        | washing                        | 108     | washing feet                        |
|           |                                | 109     | waxing back                         |
| 40        | waxing                         | 110     | waxing chest                        |

Table 18. List of the fine classes in K400-TA Set 2

| Coarse ID | Coarse motion                                | Fine ID | Coarse motion + fine motion |
|-----------|----------------------------------------------|---------|-----------------------------|
| 0         | blowing with mouth                           | 0       | blowing out candles         |
| 1         | building a structure                         | 1       | building shed               |
| 2         | catching or throwing other objects than ball | 2       | throwing discus             |
|           |                                              | 3       | cleaning shoes              |
| 3         | cleaning                                     | 4       | cleaning toilet             |
|           |                                              | 5       | cleaning windows            |
|           |                                              | 6       | climbing tree               |
| 4         | climbing                                     | 7       | ice climbing                |
| 5         | cooking                                      | 8       | cooking on campfire         |

Continued on next page

| Coarse ID | Coarse motion                          | Fine ID | Coarse motion + fine motion   |
|-----------|----------------------------------------|---------|-------------------------------|
| 6         | dancing                                | 9       | cooking sausages              |
|           |                                        | 10      | flipping pancake              |
|           |                                        | 11      | frying vegetables             |
|           |                                        | 12      | krumping                      |
|           |                                        | 13      | robot dancing                 |
|           |                                        | 14      | salsa dancing                 |
|           |                                        | 15      | swing dancing                 |
|           |                                        | 16      | tango dancing                 |
| 7         | drinking                               | 17      | tap dancing                   |
|           |                                        | 18      | zumba                         |
| 8         | eating                                 | 19      | drinking water or soft drinks |
|           |                                        | 20      | tasting beer                  |
|           |                                        | 21      | eating hotdog                 |
|           |                                        | 22      | eating ice cream              |
|           |                                        | 23      | eating spaghetti              |
| 9         | feeding                                | 24      | eating watermelon             |
|           |                                        | 25      | tasting food                  |
| 10        | fishing                                | 26      | feeding goats                 |
| 11        | folding                                | 27      | ice fishing                   |
| 12        | gardenning                             | 28      | folding paper                 |
|           |                                        | 29      | trimming trees                |
| 13        | grooming animal                        | 30      | watering plants               |
|           |                                        | 31      | grooming horse                |
| 14        | hair care                              | 32      | fixing hair                   |
|           |                                        | 33      | getting a haircut             |
|           |                                        | 34      | trimming or shaving beard     |
| 15        | juggling                               | 35      | juggling fire                 |
|           |                                        | 36      | juggling soccer ball          |
| 16        | jumping                                | 37      | jumping into pool             |
|           |                                        | 38      | playing kickball              |
| 17        | kicking                                | 39      | shooting goal (soccer)        |
|           |                                        | 40      | side kick                     |
| 18        | maintaining vehicle                    | 41      | checking tires                |
|           |                                        | 42      | pumping gas                   |
| 19        | massaging                              | 43      | massaging legs                |
|           |                                        | 44      | massaging person's head       |
| 20        | music without instrument               | 45      | singing                       |
| 21        | opening something                      | 46      | opening present               |
| 22        | petting animal                         | 47      | petting cat                   |
| 23        | playing by hitting ball with something | 48      | golf putting                  |
|           |                                        | 49      | playing cricket               |
| 24        | playing instrument                     | 50      | playing harp                  |
|           |                                        | 51      | playing keyboard              |
|           |                                        | 52      | playing organ                 |
|           |                                        | 53      | playing piano                 |
|           |                                        | 54      | playing recorder              |
|           |                                        | 55      | playing saxophone             |
|           |                                        | 56      | playing trombone              |
|           |                                        | 57      | playing trumpet               |
|           |                                        | 58      | playing ukulele               |

Continued on next page

| Coarse ID | Coarse motion                  | Fine ID | Coarse motion + fine motion             |
|-----------|--------------------------------|---------|-----------------------------------------|
|           |                                | 59      | playing violin                          |
|           |                                | 60      | playing xylophone                       |
|           |                                | 61      | strumming guitar                        |
|           |                                | 62      | tapping guitar                          |
| 25        | playing with ball in hand      | 63      | catching or throwing softball           |
|           |                                | 64      | passing American football (not in game) |
|           |                                | 65      | playing basketball                      |
|           |                                | 66      | playing volleyball                      |
|           |                                | 67      | shooting basketball                     |
| 26        | preparing fruit or vegetable   | 68      | cutting watermelon                      |
|           |                                | 69      | peeling potatoes                        |
| 27        | punching                       | 70      | punching person (boxing)                |
| 28        | pushing                        | 71      | pushing wheelchair                      |
| 29        | reading                        | 72      | reading newspaper                       |
| 30        | riding animal                  | 73      | riding mule                             |
|           |                                | 74      | riding or walking with horse            |
| 31        | riding on something over water | 75      | water sliding                           |
|           |                                | 76      | windsurfing                             |
| 32        | riding vehicle                 | 77      | driving tractor                         |
|           |                                | 78      | riding a bike                           |
|           |                                | 79      | riding mountain bike                    |
|           |                                | 80      | riding unicycle                         |
|           |                                | 81      | using segway                            |
| 33        | shaving                        | 82      | shaving legs                            |
| 34        | skiing                         | 83      | skiing crosscountry                     |
|           |                                | 84      | skiing slalom                           |
| 35        | smoking                        | 85      | smoking hookah                          |
| 36        | swimming                       | 86      | snorkeling                              |
|           |                                | 87      | swimming butterfly stroke               |
| 37        | toddler interaction            | 88      | crawling baby                           |
| 38        | tying                          | 89      | tying tie                               |
| 39        | washing                        | 90      | washing hair                            |
|           |                                | 91      | washing hands                           |
| 40        | waxing                         | 92      | waxing eyebrows                         |
|           |                                | 93      | waxing legs                             |

### D.3. Something-something-v2 - Transferable Activity

Table 19. List of coarse classes for SSv2-TA

| Coarse ID | Coarse motion   |
|-----------|-----------------|
| 0         | Bending         |
| 1         | Dropping        |
| 2         | Holding         |
| 3         | Letting to roll |
| 4         | Lifting         |
| 5         | Moving          |
| 6         | Plugging        |
| 7         | Poking          |
| 8         | Pouring         |



| Coarse ID | Coarse motion       |
|-----------|---------------------|
| 9         | Pretending          |
| 10        | Pulling             |
| 11        | Pushing             |
| 12        | Putting             |
| 13        | Showing             |
| 14        | Colliding deflected |
| 15        | Falling             |
| 16        | Spilling            |
| 17        | Spinning            |
| 18        | Taking              |
| 19        | Tearing             |
| 20        | Throwing            |
| 21        | Tilting             |
| 22        | Tipping             |
| 23        | Trying but failing  |
| 24        | Turning             |
| 25        | Twisting            |

Table 20. List of the fine classes in SSv2-TA Set 1

| Coarse ID | Coarse motion   | Fine ID | Coarse motion + fine motion                                                |
|-----------|-----------------|---------|----------------------------------------------------------------------------|
| 0         | Bending         | 0       | Bending something so that it deforms                                       |
| 1         | Dropping        | 1       | Dropping something behind something                                        |
|           |                 | 2       | Dropping something in front of something                                   |
|           |                 | 3       | Dropping something into something                                          |
| 2         | Holding         | 4       | Holding something                                                          |
|           |                 | 5       | Holding something behind something                                         |
|           |                 | 6       | Holding something in front of something                                    |
| 3         | Letting to roll | 7       | Letting something roll along a flat surface                                |
|           |                 | 8       | Letting something roll down a slanted surface                              |
| 4         | Lifting         | 9       | Lifting a surface with something on it but not enough for it to slide down |
|           |                 | 10      | Lifting a surface with something on it until it starts sliding down        |
|           |                 | 11      | Lifting something up completely without letting it drop down               |
|           |                 | 12      | Lifting something up completely, then letting it drop down                 |
| 5         | Moving          | 13      | Moving away from something with your camera                                |
|           |                 | 14      | Moving part of something                                                   |
|           |                 | 15      | Moving something across a surface until it falls down                      |
|           |                 | 16      | Moving something across a surface without it falling down                  |
|           |                 | 17      | Moving something and something away from each other                        |
|           |                 | 18      | Moving something and something closer to each other                        |

Continued on next page

| Coarse ID | Coarse motion | Fine ID | Coarse motion + fine motion                                                      |
|-----------|---------------|---------|----------------------------------------------------------------------------------|
| 6         | Plugging      | 19      | Moving something and something so they collide with each other                   |
|           |               | 20      | Plugging something into something                                                |
| 7         | Poking        | 21      | Poking a hole into some substance                                                |
|           |               | 22      | Poking a hole into something soft                                                |
|           |               | 23      | Poking a stack of something so the stack collapses                               |
|           |               | 24      | Poking a stack of something without the stack collapsing                         |
| 8         | Pouring       | 25      | Pouring something into something                                                 |
|           |               | 26      | Pouring something into something until it overflows                              |
| 9         | Pretending    | 27      | Pretending or failing to wipe something off of something                         |
|           |               | 28      | Pretending or trying and failing to twist something                              |
|           |               | 29      | Pretending to be tearing something that is not tearable                          |
|           |               | 30      | Pretending to close something without actually closing it                        |
|           |               | 31      | Pretending to open something without actually opening it                         |
|           |               | 32      | Pretending to pick something up                                                  |
|           |               | 33      | Pretending to poke something                                                     |
|           |               | 34      | Pretending to pour something out of something, but something is empty            |
|           |               | 35      | Pretending to put something behind something                                     |
|           |               | 36      | Pretending to put something into something                                       |
| 10        | Pulling       | 37      | Pretending to put something next to something                                    |
|           |               | 38      | Pulling something from behind of something                                       |
|           |               | 39      | Pulling something from left to right                                             |
|           |               | 40      | Pulling something from right to left                                             |
|           |               | 41      | Pulling something onto something                                                 |
| 11        | Pushing       | 42      | Pushing something from left to right                                             |
|           |               | 43      | Pushing something from right to left                                             |
|           |               | 44      | Pushing something off of something                                               |
|           |               | 45      | Pushing something onto something                                                 |
|           |               | 46      | Pushing something so it spins                                                    |
| 12        | Putting       | 47      | Putting number of something onto something                                       |
|           |               | 48      | Putting something and something on the table                                     |
|           |               | 49      | Putting something behind something                                               |
|           |               | 50      | Putting something in front of something                                          |
|           |               | 51      | Putting something into something                                                 |
|           |               | 52      | Putting something next to something                                              |
|           |               | 53      | Putting something on a flat surface without letting it roll                      |
|           |               | 54      | Putting something on a surface                                                   |
|           |               | 55      | Putting something on the edge of something so it is not supported and falls down |
| 13        | Showing       | 56      | Putting something onto a slanted surface but it doesn't glide down               |
|           |               | 57      | Showing a photo of something to the camera                                       |
|           |               | 58      | Showing something behind something                                               |

Continued on next page

| Coarse ID | Coarse motion       | Fine ID | Coarse motion + fine motion                                                  |
|-----------|---------------------|---------|------------------------------------------------------------------------------|
| 14        | Colliding deflected | 59      | Showing something next to something                                          |
|           |                     | 60      | Showing something on top of something                                        |
|           |                     | 61      | Something being deflected from something                                     |
|           |                     | 62      | Something colliding with something and both are being deflected              |
| 15        | Falling             | 63      | Something falling like a feather or paper                                    |
| 16        | Spilling            | 64      | Spilling something behind something                                          |
|           |                     | 65      | Spilling something next to something                                         |
| 17        | Spinning            | 66      | Spinning something so it continues spinning                                  |
| 18        | Taking              | 67      | Taking one of many similar things on the table                               |
|           |                     | 68      | Taking something from somewhere                                              |
| 19        | Tearing             | 69      | Tearing something into two pieces                                            |
| 20        | Throwing            | 70      | Throwing something                                                           |
|           |                     | 71      | Throwing something against something                                         |
|           |                     | 72      | Throwing something in the air and catching it                                |
| 21        | Tilting             | 73      | Tilting something with something on it slightly so it doesn't fall down      |
| 22        | Tipping             | 74      | Tipping something over                                                       |
| 23        | Trying but failing  | 75      | Trying but failing to attach something to something because it doesn't stick |
|           |                     | 76      | Trying to bend something unbendable so nothing happens                       |
| 24        | Turning             | 77      | Turning something upside down                                                |
|           |                     | 78      | Turning the camera downwards while filming something                         |
|           |                     | 79      | Turning the camera left while filming something                              |
| 25        | Twisting            | 80      | Twisting (wringing) something wet until water comes out                      |

Table 21. List of the fine classes in SSv2-TA Set 2

| Coarse ID | Coarse motion   | Fine ID | Coarse motion + fine motion                                        |
|-----------|-----------------|---------|--------------------------------------------------------------------|
| 0         | Bending         | 0       | Bending something until it breaks                                  |
| 1         | Dropping        | 1       | Dropping something next to something                               |
|           |                 | 2       | Dropping something onto something                                  |
| 2         | Holding         | 3       | Holding something next to something                                |
|           |                 | 4       | Holding something over something                                   |
| 3         | Letting to roll | 5       | Letting something roll up a slanted surface, so it rolls back down |
| 4         | Lifting         | 6       | Lifting something with something on it                             |
|           |                 | 7       | Lifting up one end of something without letting it drop down       |
|           |                 | 8       | Lifting up one end of something, then letting it drop down         |
| 5         | Moving          | 9       | Moving something and something so they pass each other             |
|           |                 | 10      | Moving something away from something                               |
|           |                 | 11      | Moving something away from the camera                              |
|           |                 | 12      | Moving something closer to something                               |
|           |                 | 13      | Moving something down                                              |

Continued on next page

| Coarse ID | Coarse motion | Fine ID | Coarse motion + fine motion                                                                        |
|-----------|---------------|---------|----------------------------------------------------------------------------------------------------|
| 6         | Plugging      | 14      | Moving something towards the camera                                                                |
|           |               | 15      | Moving something up                                                                                |
|           |               | 16      | Plugging something into something but pulling it right out as you remove your hand                 |
| 7         | Poking        | 17      | Poking something so it slightly moves                                                              |
|           |               | 18      | Poking something so lightly that it doesn't or almost doesn't move                                 |
|           |               | 19      | Poking something so that it falls over                                                             |
|           |               | 20      | Poking something so that it spins around                                                           |
| 8         | Pouring       | 21      | Pouring something onto something                                                                   |
|           |               | 22      | Pouring something out of something                                                                 |
| 9         | Pretending    | 23      | Pretending to put something on a surface                                                           |
|           |               | 24      | Pretending to put something onto something                                                         |
|           |               | 25      | Pretending to put something underneath something                                                   |
|           |               | 26      | Pretending to scoop something up with something                                                    |
|           |               | 27      | Pretending to spread air onto something                                                            |
|           |               | 28      | Pretending to sprinkle air onto something                                                          |
|           |               | 29      | Pretending to squeeze something                                                                    |
|           |               | 30      | Pretending to take something from somewhere                                                        |
|           |               | 31      | Pretending to take something out of something                                                      |
|           |               | 32      | Pretending to throw something                                                                      |
|           |               | 33      | Pretending to turn something upside down                                                           |
| 10        | Pulling       | 34      | Pulling something out of something                                                                 |
|           |               | 35      | Pulling two ends of something but nothing happens                                                  |
|           |               | 36      | Pulling two ends of something so that it gets stretched                                            |
|           |               | 37      | Pulling two ends of something so that it separates into two pieces                                 |
| 11        | Pushing       | 38      | Pushing something so that it almost falls off but doesn't                                          |
|           |               | 39      | Pushing something so that it falls off the table                                                   |
|           |               | 40      | Pushing something so that it slightly moves                                                        |
|           |               | 41      | Pushing something with something                                                                   |
| 12        | Putting       | 42      | Putting something onto something                                                                   |
|           |               | 43      | Putting something onto something else that cannot support it so it falls down                      |
|           |               | 44      | Putting something similar to other things that are already on the table                            |
|           |               | 45      | Putting something that can't roll onto a slanted surface, so it slides down                        |
|           |               | 46      | Putting something that can't roll onto a slanted surface, so it stays where it is                  |
|           |               | 47      | Putting something that cannot actually stand upright upright on the table, so it falls on its side |
|           |               | 48      | Putting something underneath something                                                             |
|           |               | 49      | Putting something upright on the table                                                             |
|           |               | 50      | Putting something, something and something on the table                                            |
| 13        | Showing       | 51      | Showing something to the camera                                                                    |

Continued on next page

| <b>Coarse ID</b> | <b>Coarse motion</b> | <b>Fine ID</b> | <b>Coarse motion + fine motion</b>                                           |
|------------------|----------------------|----------------|------------------------------------------------------------------------------|
| 14               | Colliding deflected  | 52             | Showing that something is empty                                              |
|                  |                      | 53             | Showing that something is inside something                                   |
|                  |                      | 54             | Something colliding with something and both come to a halt                   |
| 15               | Falling              | 55             | Something falling like a rock                                                |
| 16               | Spilling             | 56             | Spilling something onto something                                            |
| 17               | Spinning             | 57             | Spinning something that quickly stops spinning                               |
| 18               | Taking               | 58             | Taking something out of something                                            |
| 19               | Tearing              | 59             | Tearing something just a little bit                                          |
| 20               | Throwing             | 60             | Throwing something in the air and letting it fall                            |
|                  |                      | 61             | Throwing something onto a surface                                            |
| 21               | Tilting              | 62             | Tilting something with something on it until it falls off                    |
| 22               | Tipping              | 63             | Tipping something with something in it over, so something in it falls out    |
| 23               | Trying but failing   | 64             | Trying to pour something into something, but missing so it spills next to it |
| 24               | Turning              | 65             | Turning the camera right while filming something                             |
|                  |                      | 66             | Turning the camera upwards while filming something                           |
| 25               | Twisting             | 67             | Twisting something                                                           |
